# Supplementary material
Source: publisher figshare collection journal article supplement (https://tandf.figshare.com/ndownloader/files/14859221)
Supplement: Supplementary file 1 [file 14859221]

**Additional file 1:** Hemoglobin levels and total leucocyte count across the species at presentation

|  | ***P. falciparum***  **(n=29)**  **n (%)** | ***P. vivax***  **(n=98)**  **n (%)** | **Mixed**  **(n=5)**  **n (%)** |
| --- | --- | --- | --- |
| **MALES** |  |  |  |
| >13 gm/dL | 22(75.9) | 56(57.1) | 3(60) |
| 10.1-13 gm/dL | 6(20.7) | 36(36.7) | 2(40) |
| 7.1-10 gm/dL | 1(3.4) | 6(6.1) | 0 |
| <7 gm/dL | 0 | 0 | 0 |
|  | ***P. falciparum***  **(n=8)**  **n (%)** | ***P. vivax***  **(n=18)**  **n (%)** | **Mixed**  **(n=1)**  **n (%)** |
| **FEMALES** |  |  |  |
| >12 gm/dL | 5(62.5) | 5(27.8) | 1(100) |
| 10.1-12 gm/dL | 2(25) | 11(61.1) | 0 |
| 7.1-10 gm/dL | 1(12.5) | 2(11.1) | 0 |
| <7 gm/dL | 0 | 0 | 0 |
|  | ***P. falciparum***  **(n=37)**  **n (%)** | ***P. vivax***  **(n=116)**  **n (%)** | **Mixed**  **(n=6)**  **n (%)** |
|  |
| Leucopenia n(%) <4000 cells/mm3 | 9(24.3) | 26(22.4) | 1(16.7) |
| Normal n(%) 4000-11000 cells/mm3 | 28(75.7) | 89(76.7) | 4(66.6) |
| Leucocytosis n(%) >11000 cells/mm3 | 0 | 1(0.8) | 1(16.7) |

**Additional file 2a.** Scatter plot depicting the platelet count vs duration of fever in *Plasmodium falciparum* patients

**Additional file 2b.** Scatter plot depicting the platelet count vs duration of fever in *Plasmodium vivax* patients

**Additional file 3:** Correlation of platelet count and platelet indices

**
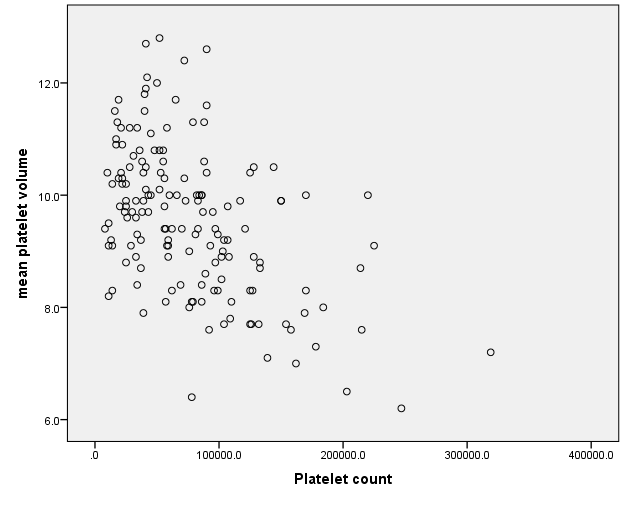

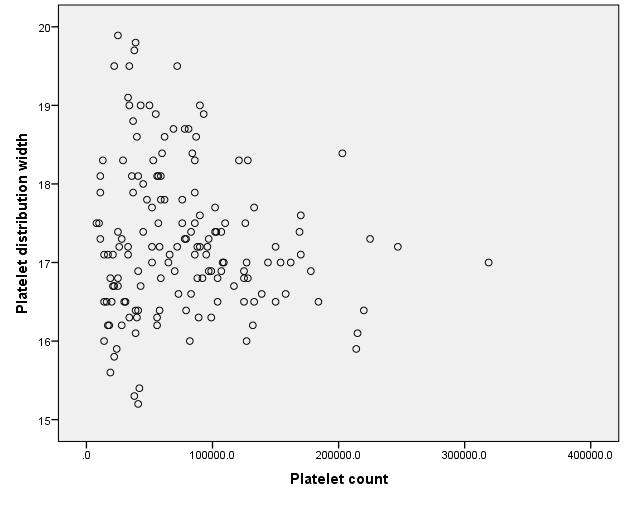

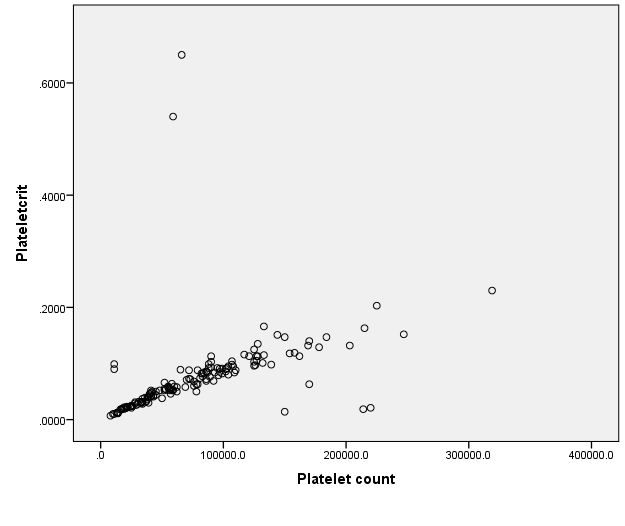
**

**Additional file 4:** Platelet parameters with respect to spontaneous bleeding

| **Abnormal bleeding** | **PLT cells/mm3** | **PCT (%)** | **MPV(fl)** | **PDW (%)** |
| --- | --- | --- | --- | --- |
| Subdural hematoma (n=1) | 13000 | 0.012 | 9.2 | 18.3 |
| Haemoptysis (n=1) | 11000 | 0.01 | 9.5 | 17.3 |
| Bleeding PR (n=1) | 37000 | 0.032 | 8.7 | 18.8 |
| Hematuria (n=2) | 33000 | 0.03 | 9.1 | 18.1 |
| **With bleeding ( mean)** |  |  |  |  |
| 29000 | 0.02 | 9.1 | 18.1 |
| No evidence of bleeding | 69500 | 0.06 | 9.6 | 17.2 |
